# Supplementary figures and images for: Developing a method to derive alcohol-attributable fractions for HIV/AIDS mortality based on alcohol's impact on adherence to antiretroviral medication
Source: Springer Nature journal article supplement (doi:10.1186/1478-7954-9-5), 2011-02-14

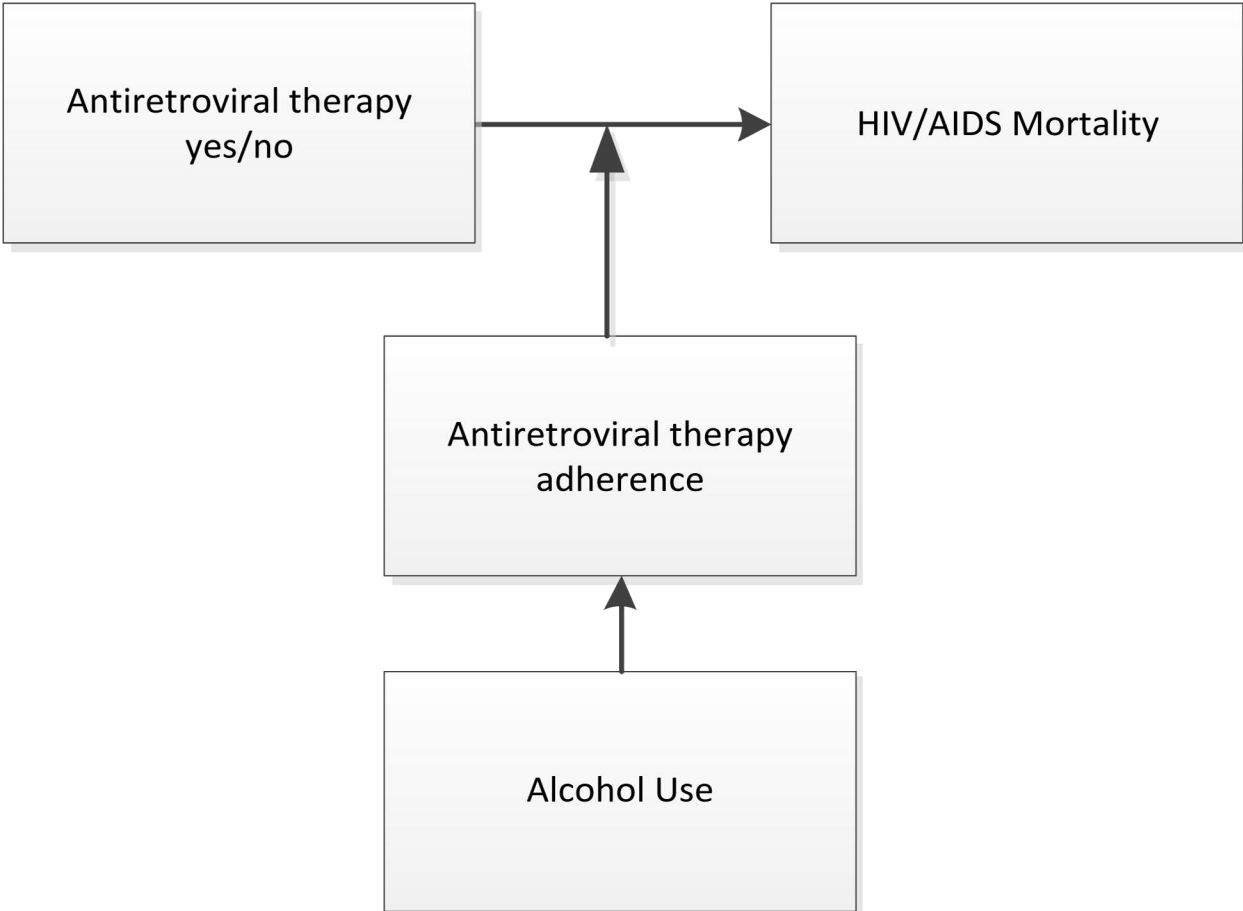

Supplement: 12963_2010_127_MOESM2_ESM.pdf [file 12963_2010_127_MOESM2_ESM.pdf]

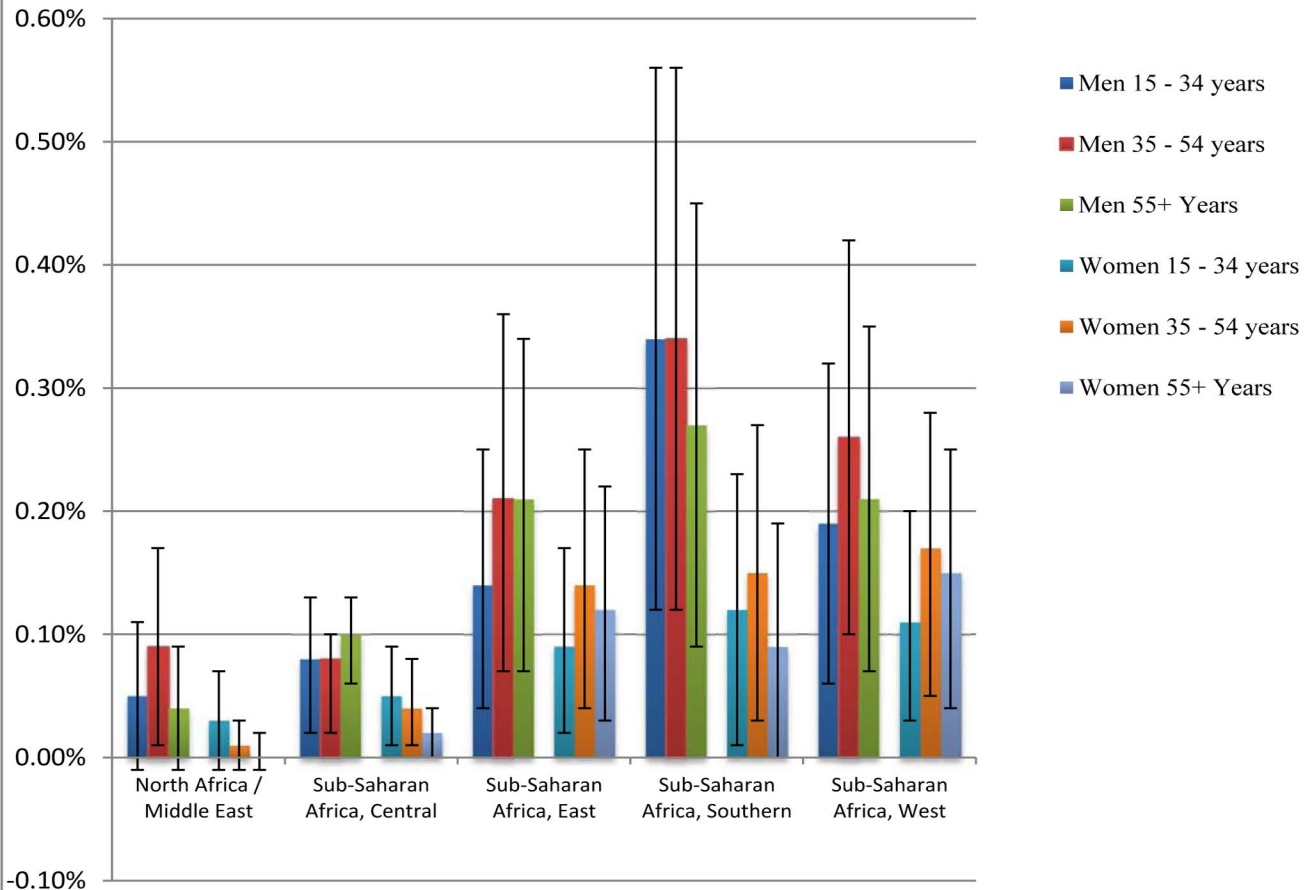

Supplement: 12963_2010_127_MOESM3_ESM.pdf [file 12963_2010_127_MOESM3_ESM.pdf]
